# Supplementary material
Source: PubMed Central journal article supplement (PMC3911168)
Supplement: JB.01270-13_zjb004143032so1.pdf [file JB.01270-13_zjb004143032so1.pdf]

SUPPLEMENTAL FIG S1

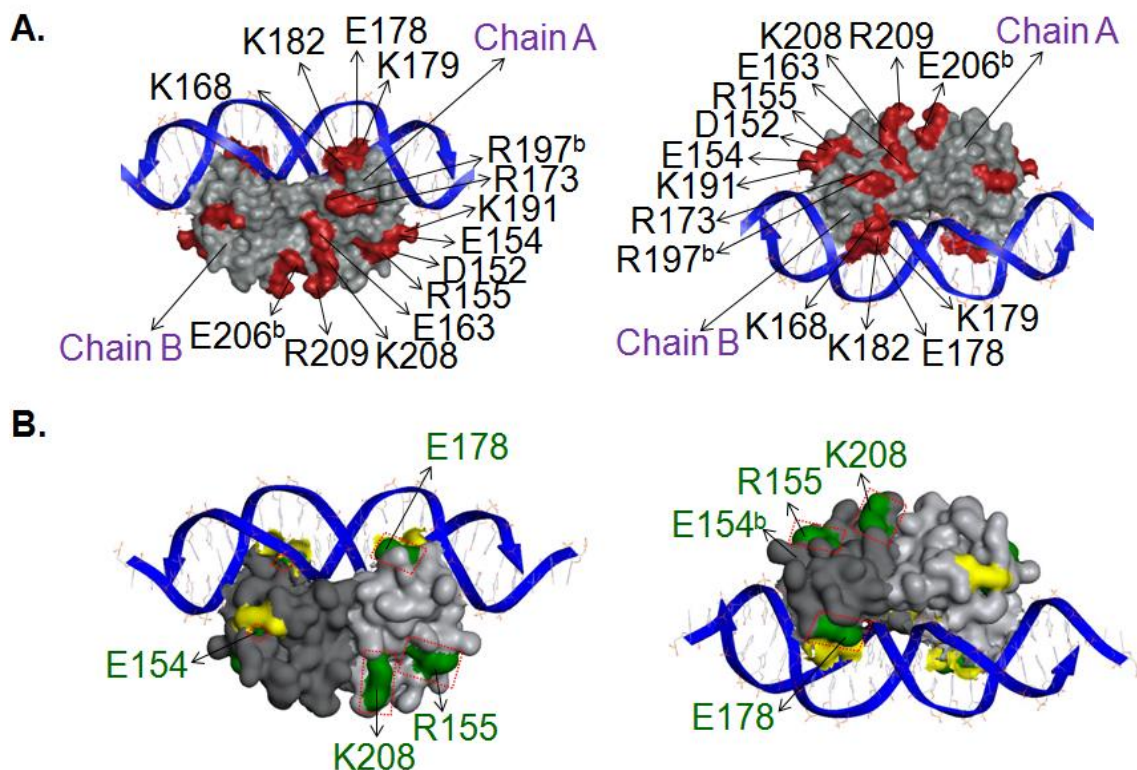

**FIG S1 Location of amino acids important for DevR-mediated activation. A.** All amino acids mutated in this study are colored in red. **B.** pc mutants (pc) are in dark green and boxed in red rectangles. Alanine substitution mutants defective in DNA binding are in yellow (K191, R197 and K179). The molecular surface representation of both chains of DevR<sub>C</sub> (chains A and B in light grey and dark grey) was created from data in PDB file 3C3W (Wisedchaisri *et al.*, 2008) using a marching cubes algorithm of Discovery Studio 3.1 and probe radius of 1.4Å. Individual surfaces of amino acid atoms were depicted by custom colors to highlight the mutations studied. The blue arrows represent the backbone of double stranded DNA, ‘b’ suffix for some residues (e.g. E154<sup>b</sup>) indicates that this residue is located at the back.

SUPPLEMENTAL FIG S2

A. DevR<sub>C</sub> (DosR<sub>C</sub>)

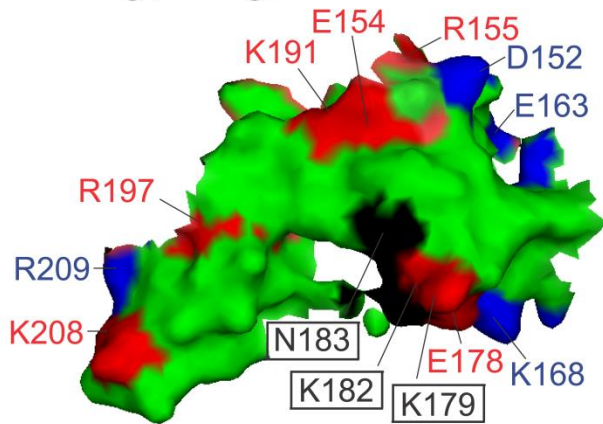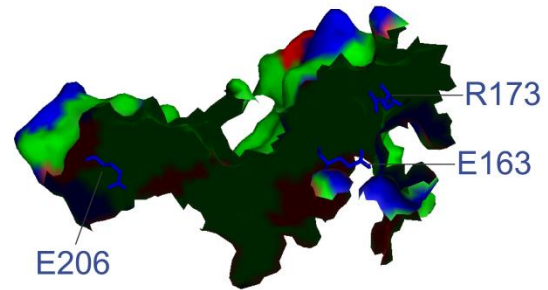

B. NarL<sub>C</sub>

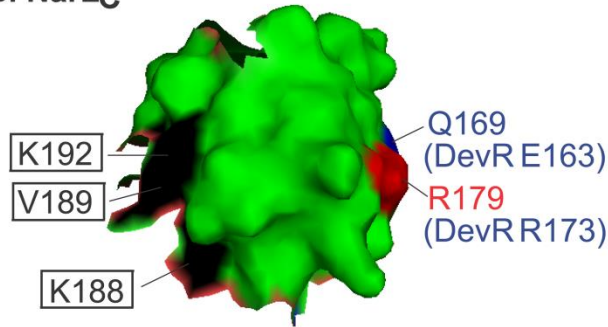

D. FixJ<sub>C</sub>

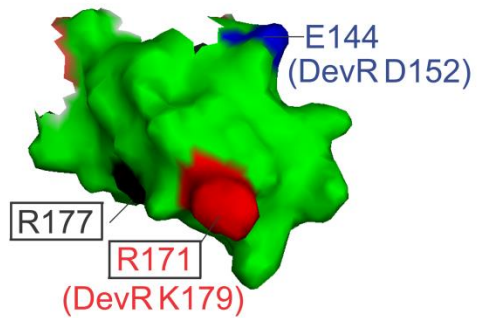

C. SsrB<sub>C</sub>

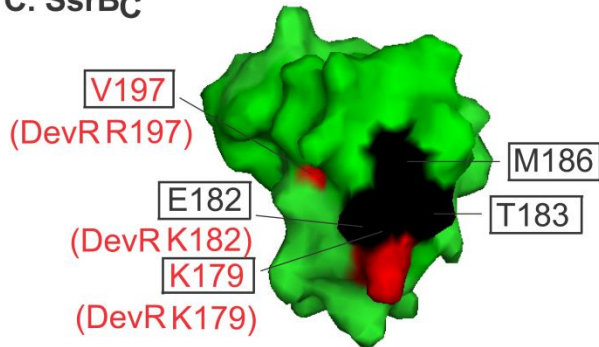

E.

|      |     | $\alpha 7$           |     |  |
|------|-----|----------------------|-----|--|
| DevR | 152 | DQ <b>ERT</b> LLGLLS | 162 |  |
| NarL | 158 | PR <b>ERD</b> ILKLI  | 168 |  |
| FixJ | 144 | ER <b>ERQ</b> VLSAVV | 154 |  |
| SsrB | 152 | LR <b>ERQ</b> VLKLID | 162 |  |

|      |     | $\alpha 9$                                                           |     |  |
|------|-----|----------------------------------------------------------------------|-----|--|
| DevR | 178 | E <b>K</b> T <b>V</b> K <b>N</b> YVS <b>R</b> LL <b>A</b> K          | 191 |  |
| NarL | 184 | EST <b>V</b> K <b>V</b> H <b>V</b> K <b>H</b> ML <b>K</b> K          | 197 |  |
| FixJ | 170 | P <b>R</b> T <b>V</b> E <b>V</b> H <b>R</b> AN <b>V</b> MA <b>K</b>  | 183 |  |
| SsrB | 178 | I <b>K</b> T <b>V</b> E <b>T</b> H <b>R</b> M <b>N</b> MM <b>R</b> K | 191 |  |

FIG S2 Comparison of DevR<sub>C</sub>/DosR<sub>C</sub> with NarL family members. A. Left panel:

DevR<sub>C</sub>/DosR<sub>C</sub> structure was generated from PDB file 3C3W (Wisedchaisri *et al.*, 2008) using

PyMol. Amino acid mutations that are proficient (in blue) and defective (in red) in transcription

activation are indicated. Right panel: Back view of DevR<sub>C</sub>/DosR<sub>C</sub>. **B-D**. The amino acids in the DevR orthologs corresponding to amino acids with known phenotypes in DevR are indicated using the same color code as in panel A. The residues with probable or confirmed DNA binding function are boxed. PDB files 3C3W, 1RNL, 1X3U and 2JPC were used to generate protein structures for DosR/ DevR, NarL, FixJ and SsrB, respectively using PyMol. **E**. Protein sequence alignment of DevR and orthologs for  $\alpha$  7 and  $\alpha$  9 helices. Three residues that are conserved among all regulators and display a pc phenotype (E, R and K) in DevR are in bold. The residues implicated in binding to DNA are underlined.



|           |                         |                                                 |
|-----------|-------------------------|-------------------------------------------------|
| RT16S f   | ATGACGGCCTTCGGGTTGTAA   | Real Time RT PCR (Gautam <i>et al.</i> , 2011b) |
| RT16S r   | CGGCTGCTGGCACGTAGTTG    |                                                 |
| RT3134c f | CTGGCTGGGTCGGCCTTA      | Real Time RT PCR (Gautam <i>et al.</i> , 2011b) |
| RT3134c r | GCTGACCTGGGAGGTTGTGC    |                                                 |
| devR f4   | CCGATCTGCGCTGTCTGATC    | Real Time RT PCR (Taneja <i>et al.</i> , 2010)  |
| devR r3   | GTCCAGCGCCCACATCTTT     |                                                 |
| RTnarK2 f | CGGTTTGTACGGTGGTTCGGC'  | Real Time RT PCR (Gautam <i>et al.</i> , 2011a) |
| RTnarK2 r | TCACGAAGCACGACCATGGCC   |                                                 |
| RT1738 f  | CGACGAACACGAAGGATTGA    | Real Time RT PCR (Gautam <i>et al.</i> , 2011a) |
| RT1738 r  | ACACCCACCAATTCCTTTTCC   |                                                 |
| fdxA f    | TGTCCGGTCGACTGTATCTATGA | Real Time RT PCR (Gupta <i>et al.</i> , 2011)   |
| fdxA r    | GGCAGG CCG GTTTGC       |                                                 |
| RT2031c f | CGCACCGAGCAGAAGGA       | Real Time RT PCR (Gautam <i>et al.</i> , 2011a) |
| RT2031c r | ACCGTGCGAACGAAGGAA      |                                                 |
| RTTgs1 f  | CAGTGATTTGCGTCGCTACAG   | Real Time RT PCR (Gautam <i>et al.</i> , 2011b) |
| RTTgs1 r  | ACATCATTGATGGTGACGTCG   |                                                 |

GCT, GCC, GCA, GCG codes for Alanine; SDM- site directed mutagenesis; BamHI sites are underlined; Bold and underline represents nucleotide substitution; Bold represents substituted codon.
